# Supplementary figures and images for: Chemical Composition and antimicrobial activity of essential oils of two wild olive subspecies Olea europaea subsp. europaea var. Sylvestris and the endemic Olive Olea europaea subsp. lapperinie
Source: Research Square preprint supplement (doi:10.21203/rs.3.rs-2813217/v2), 2023-07-19

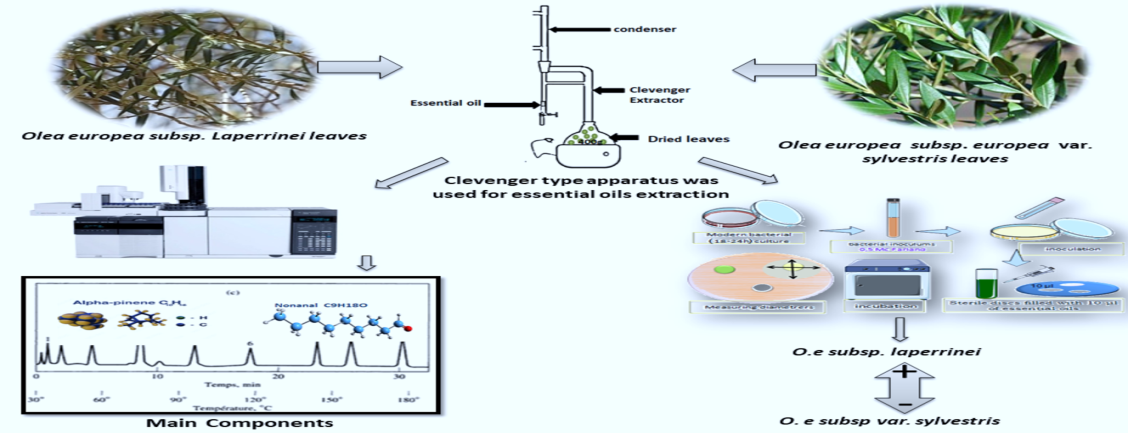

Supplement: Supplementary file 1 [file e9aa3e0fa944bd3ecf719a17.docx]
